# Supplementary material for: Differential expression of microRNA let-7b-5p regulates burn-induced hyperglycemia
Source: PubMed Central journal article supplement (PMC5641176; doi:10.18632/oncotarget.20543), 2017-08-24
Supplement: oncotarget-08-72886-s001.pdf [file oncotarget-08-72886-s001.pdf]

# Differential expression of microRNA let-7b-5p regulates burn-induced hyperglycemia

## SUPPLEMENTARY MATERIALS

Human IGF1R ENST00000268035.6 3' UTR length: 7088

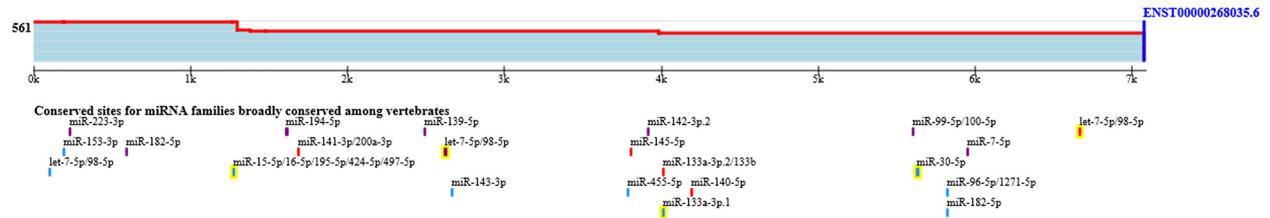

**Supplementary Figure 1: Putative miRNA targeting 3'UTR of human *IGF1R* as predicted by TargetScan algorithm. Sites with  $P_{CT} > 0.75$  are highlighted with yellow.**
